# Supplementary material for: Extreme Events Representation in CMCC-CM2 High and Very-High Resolution General Circulation Models
Source: Copernicus journal article supplement (doi:10.5194/gmd-2021-294), 2021-09-15
Supplement: Supplementary file 2 [file gmd-2021-294-supplement.pdf]

# Extreme Events Representation in CMCC-CM2 High and Very-High Resolution General Circulation Models

Enrico Scoccimarro<sup>1</sup>, Daniele Peano<sup>1</sup>, Silvio Gualdi<sup>1</sup>, Alessio Bellucci<sup>2</sup>, Tomas Lovato<sup>1</sup>, Pier  
Giuseppe Fogli<sup>1</sup> and Antonio Navarra<sup>1</sup>

<sup>1</sup>Fondazione Centro Euro-Mediterraneo sui Cambiamenti Climatici, Bologna, Italy

<sup>2</sup>Fondazione Centro Euro-Mediterraneo sui Cambiamenti Climatici, Bologna, Italy,  
currently at Consiglio Nazionale delle Ricerche, Istituto di Scienze dell'Atmosfera e del Clima,  
Bologna, Italy

Supplemental material

**GMD**

August 25, 2021

**Corresponding author:**

Enrico Scoccimarro (CMCC)

Viale Berti Pichat 6/2 40128 Bologna, Italy

E-mail: enrico.scoccimarro@cmcc.it

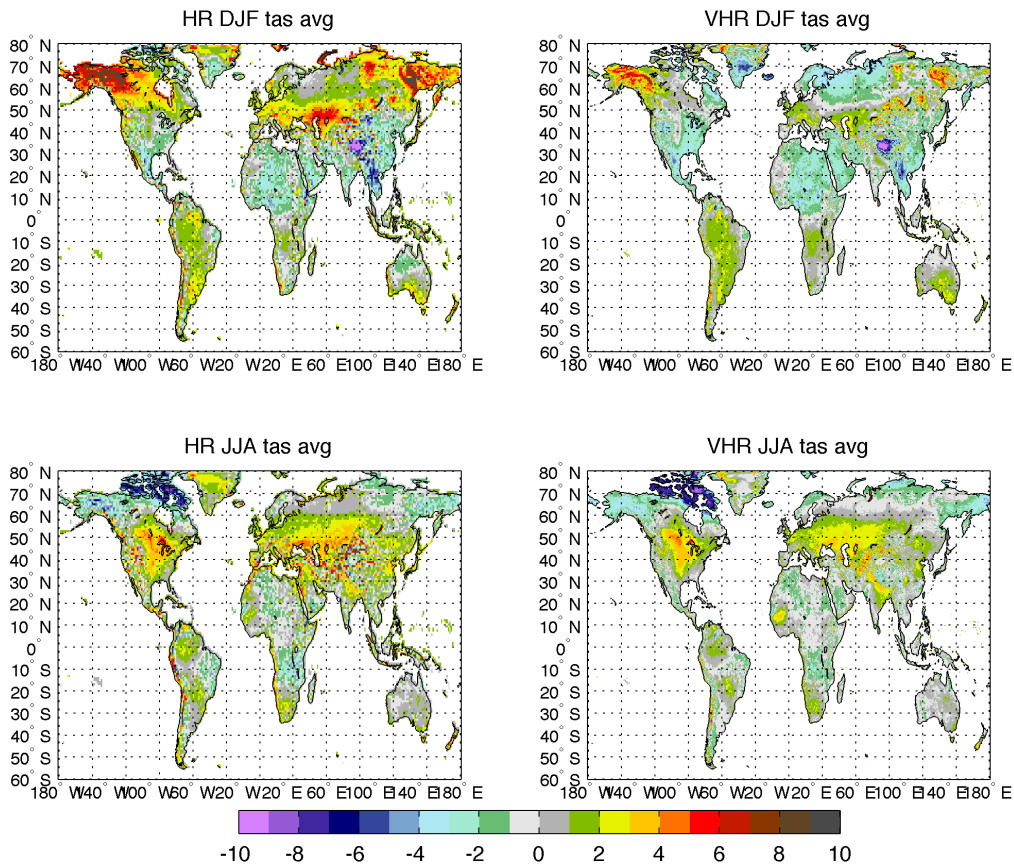

**Figure S1.** Averaged Temperature bias. Left/Right panels show HR/VHR model bias compared to ERA5. Upper/Lower panel shows boreal winter (DJF)/summer (JJA) results. Units are [°C].

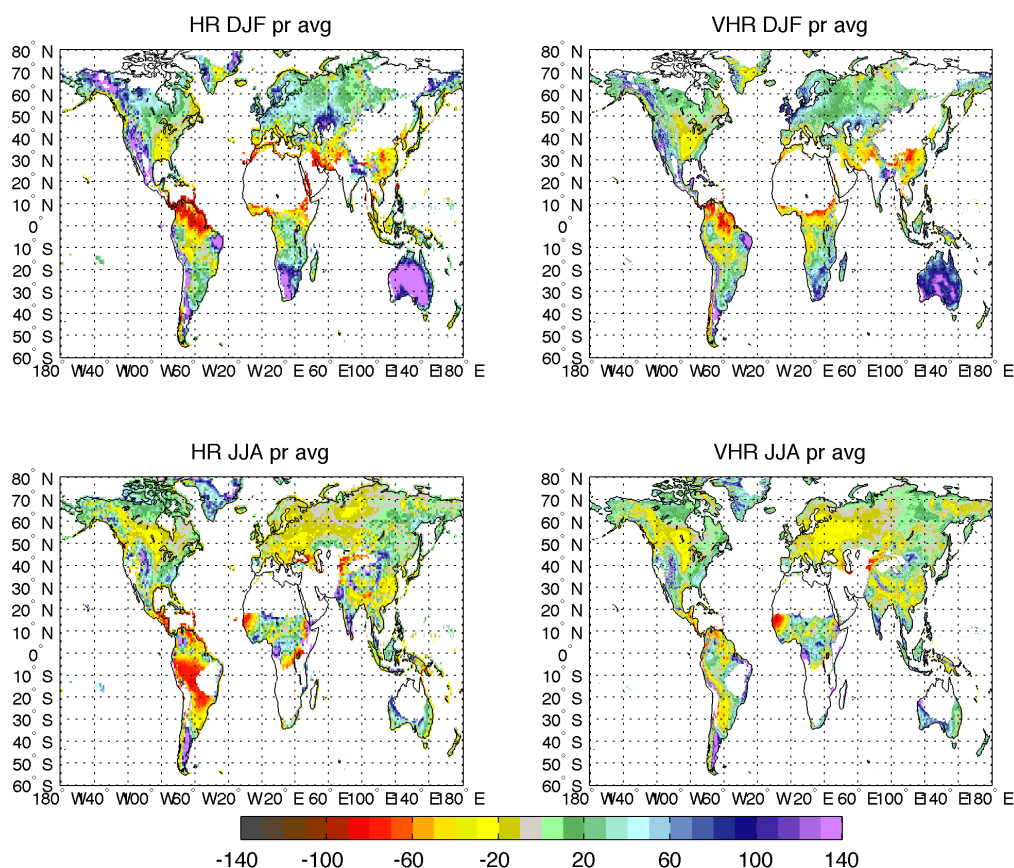

**Figure S2.** Averaged Precipitation bias. Left/Right panels show HR/VHR model bias compared to ERA5. Upper/Lower panel shows boreal winter (DJF)/summer (JJA) results. Units are [%]. White areas over land represent regions where the seasonal average precipitation is lower than 0.5 mm/d in ERA5.

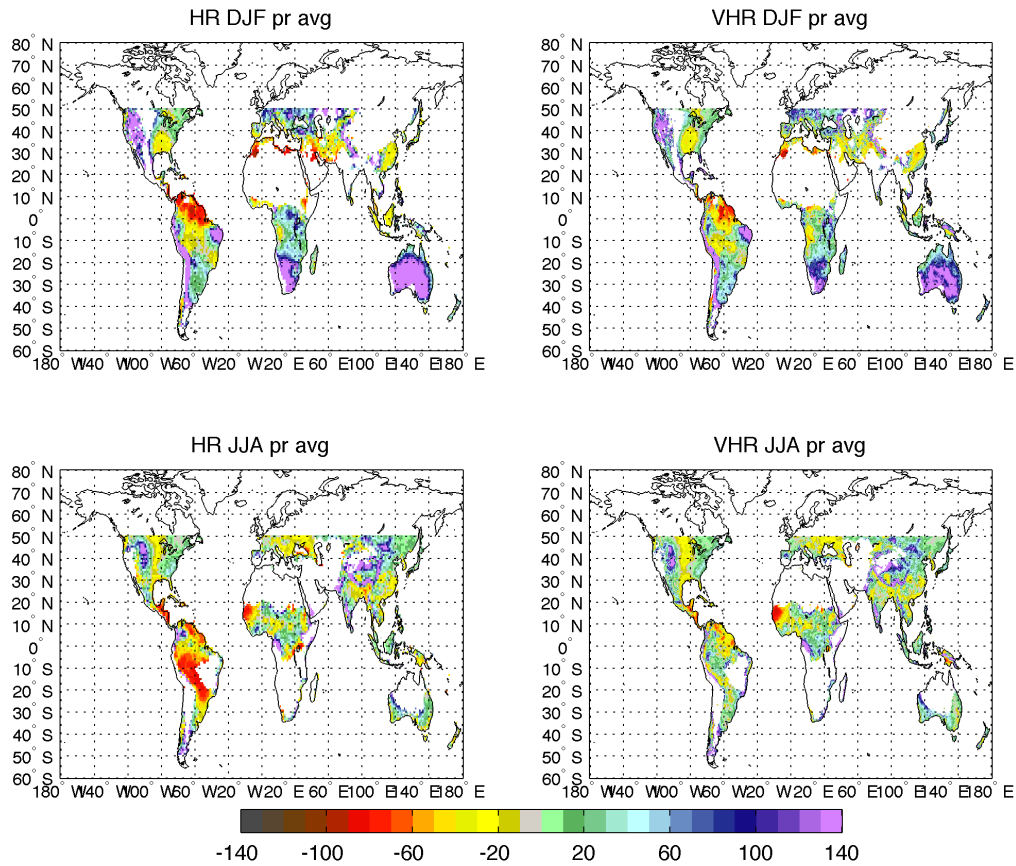

**Figure S3.** Same as Figure S2 but compared to CHIRPS observations instead of ERA5. Averaged Precipitation bias. Left/Right panel shows HR/VHR model bias compared to CHIRPS. Upper/Lower panel shows boreal winter (DJF)/summer (JJA) results. Units are [%]. White areas over land represent regions where the seasonal average precipitation is lower than 0.5 mm/d in CHIRPS. Precipitation poleward than  $\pm 50$  degrees is not available in CHIRPS data set.

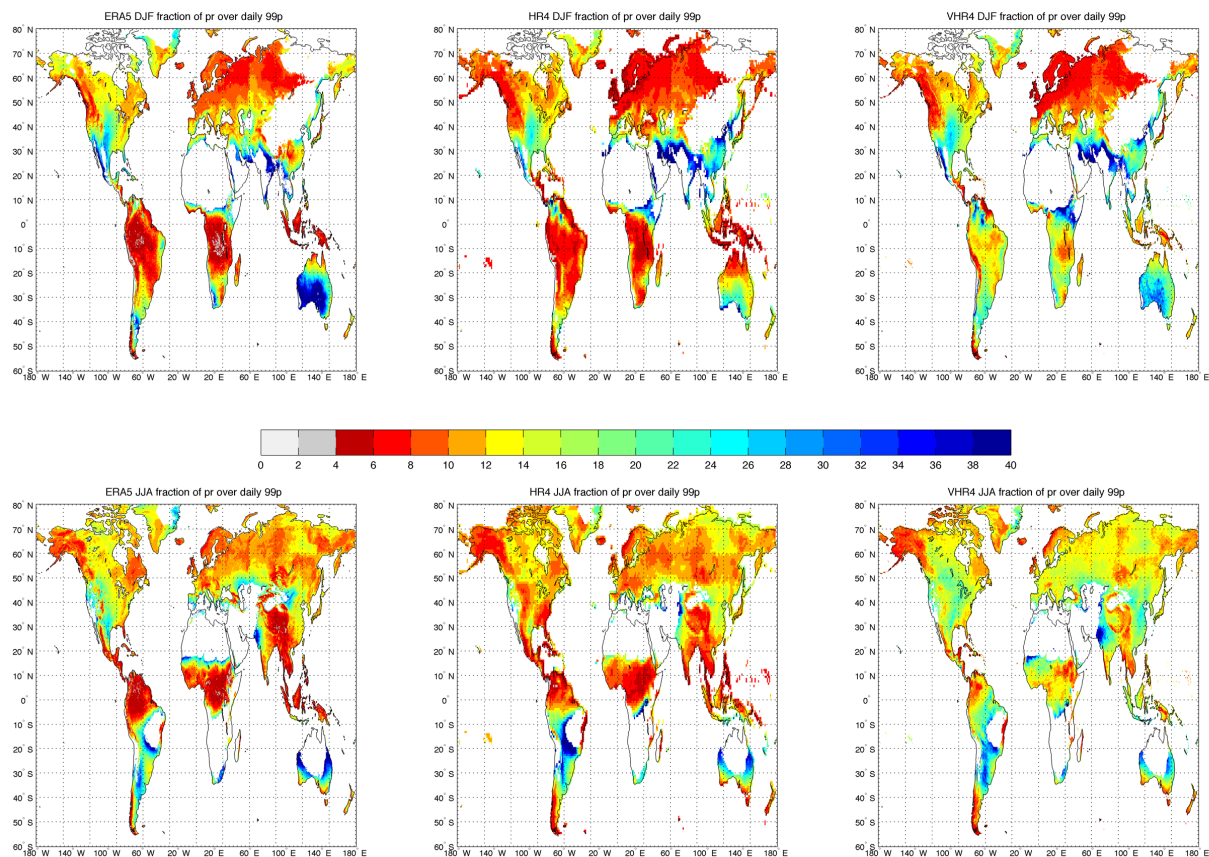

**Figure S4.** Fraction of precipitation associated with extreme events (higher or equal to the 99<sup>th</sup> percentile) with respect to the total precipitation. Left/Central/Right panel shows ERA5/HR/VHR results. Upper/Lower panel shows boreal winter (DJF)/summer (JJA) results. Units are [%]. White areas over land represent regions where the seasonal average precipitation is lower than 0.5 mm/d.
